# Supplementary material
Source: HighWire-hosted journal article supplement (https://bmjopenquality.bmj.com/content/11/3/e001708)
Supplement: inline-supplementary-material-3 [file inline-supplementary-material-3.pdf]

## DRUG CATEGORIES AND HMX EVENTS RANKED BY RAW EVENT NUMBERS

| Drug Category                      | Infusions | DERS Infusions | HMX Events | Incidence (%; all) | Incidence (%; DERS) |
|------------------------------------|-----------|----------------|------------|--------------------|---------------------|
| Antibacterial Drugs                | 279633    | 134821         | 2979       | 1.07               | 2.21                |
| Potassium chloride                 | 86746     | 32504          | 749        | 0.86               | 2.30                |
| Calcium & Magnesium                | 29243     | 16897          | 535        | 1.83               | 3.17                |
| Antiviral Drugs                    | 10582     | 4882           | 235        | 2.22               | 4.81                |
| Vitamins & Minerals                | 20160     | 9794           | 190        | 0.94               | 1.94                |
| Non-opioid analgesics              | 72119     | 38860          | 179        | 0.25               | 0.46                |
| Antiepileptics                     | 5269      | 3068           | 177        | 3.36               | 5.77                |
| Loop diuretics                     | 11711     | 5484           | 131        | 1.12               | 2.39                |
| Poisoning antidotes                | 6542      | 2325           | 98         | 1.50               | 4.22                |
| Insulin                            | 33177     | 6644           | 85         | 0.26               | 1.28                |
| Respiratory stimulants             | 1947      | 1273           | 77         | 3.95               | 6.05                |
| antiarrhythmic Drugs               | 4430      | 2018           | 74         | 1.67               | 3.67                |
| proton Pump Inhibitors             | 26989     | 15142          | 57         | 0.21               | 0.38                |
| cardiac glycosides                 | 1403      | 827            | 55         | 3.92               | 6.65                |
| Phosphorous                        | 6558      | 3237           | 45         | 0.69               | 1.39                |
| Antifungal Drugs                   | 5693      | 3157           | 43         | 0.76               | 1.36                |
| intravenous anaesthetics           | 30700     | 10882          | 38         | 0.12               | 0.35                |
| Theophylline                       | 3027      | 1171           | 35         | 1.16               | 2.99                |
| Drugs used in Nausea and Vertigc   | 6945      | 3712           | 30         | 0.43               | 0.81                |
| Posterior pituitary hormones and   | 1913      | 855            | 29         | 1.52               | 3.39                |
| Glucocorticoid therapy             | 5202      | 2883           | 27         | 0.52               | 0.94                |
| Opioid analgesics                  | 18399     | 5025           | 27         | 0.15               | 0.54                |
| Parenteral anticoagulants          | 1619      | 745            | 23         | 1.42               | 3.09                |
| Adrenoceptor agonists              | 42919     | 20441          | 23         | 0.05               | 0.11                |
| Sympathomimetics                   | 5825      | 2103           | 15         | 0.26               | 0.71                |
| Prostaglandins & oxytocics         | 2275      | 1010           | 14         | 0.62               | 1.39                |
| Treatment of hypoglycaemia         | 134       | 52             | 12         | 8.96               | 23.08               |
| Intravenous Iron                   | 154       | 100            | 12         | 7.79               | 12.00               |
| bisphosphonates                    | 214       | 143            | 8          | 3.74               | 5.59                |
| Antiproliferative immunosuppres    | 820       | 487            | 8          | 0.98               | 1.64                |
| Tocolytics                         | 9346      | 2206           | 8          | 0.09               | 0.36                |
| Fibrinolytic                       | 265       | 153            | 7          | 2.64               | 4.58                |
| Centrally acting alpha-adrenoceptl | 593       | 203            | 6          | 1.01               | 2.96                |
| Neuromuscular blocking drugs       | 1709      | 573            | 6          | 0.35               | 1.05                |
| Drugs for PCP                      | 44        | 36             | 5          | 11.36              | 13.89               |
| Beta-adrenergic receptor antagor   | 751       | 385            | 5          | 0.67               | 1.30                |
| Nitrates                           | 4017      | 1140           | 5          | 0.12               | 0.44                |
| Vitamin K                          | 431       | 260            | 4          | 0.93               | 1.54                |
| Prostaglandin analogues            | 411       | 126            | 3          | 0.73               | 2.38                |
| Peripheral Vasodilator             | 459       | 127            | 3          | 0.65               | 2.36                |
| H2-receptor antagonists            | 58        | 41             | 2          | 3.45               | 4.88                |
| Hypnotics                          | 905       | 304            | 2          | 0.22               | 0.66                |
| Calcium-channel blockers           | 88        | 39             | 1          | 1.14               | 2.56                |
| Antifibrinolytic drugs and haemos  | 3501      | 2029           | 0          | 0.00               | 0.00                |
| Phosphodiesterase Type 3 inhibit   | 60        | 46             | 0          | 0.00               | 0.00                |
| Somatostatin Analogue              | 133       | 41             | 0          | 0.00               | 0.00                |

|                                   |               |               |             |      |      |
|-----------------------------------|---------------|---------------|-------------|------|------|
| Local anaesthetics                | 46            | 7             | 0           | 0.00 | 0.00 |
| HIV Infection                     | 3             | 3             | 0           | 0.00 | 0.00 |
| Vasodilator antihypertensive drug | 2             | 2             | 0           | 0.00 | 0.00 |
| <b>Totals</b>                     | <b>745170</b> | <b>338263</b> | <b>6067</b> |      |      |
